1 Black/African American Communities are at Highest Risk of COVID-19: Spatial Modeling of  
2 New York City ZIP Code-Level Testing Results

3 Charles DiMaggio, PhD, MPH, Michael Klein, MD, Cherisse Berry, MD and Spiros Frangos,  
4 MD, MPH.

5 New York University School of Medicine, Department of Surgery  
6 Bellevue Hospital Center Division of Trauma and Surgical Critical Care  
7 New York, NY

8  
9 21 May 2020

10 **Introduction.** The population and spatial characteristics of COVID-19 infections are poorly  
11 understood, but there is increasing evidence that in addition to individual clinical factors,  
12 demographic, socioeconomic and racial characteristics play an important role.

13  
14 **Methods.** We analyzed positive COVID-19 testing results counts within New York City ZIP Code  
15 Tabulation Areas (ZCTA) with Bayesian hierarchical Poisson spatial models using integrated nested  
16 Laplace approximations.

17  
18 **Results.** Spatial clustering accounted for approximately 32% of the variation in the data. For every  
19 one unit increase in a scaled standardized measure of Chronic Obstructive Pulmonary Disease  
20 (COPD) in a community, there was an approximate 8-fold increase in the risk of a positive COVID-  
21 19 test in a ZCTA (Incidence Density Ratio = 8.2, 95% Credible Interval 3.7, 18.3). There was a  
22 nearly five-fold increase in the risk of a positive COVID-19 test. (IDR = 4.8, 95% Cr I 2.4, 9.7)  
23 associated with the proportion of Black / African American residents. Increases in the proportion of  
24 residents older than 65, housing density and the proportion of residents with heart disease were  
25 each associated with an approximate doubling of risk. In a multivariable model including estimates  
26 for age, COPD, heart disease, housing density and Black/African American race, the only variables  
27 that remained associated with positive COVID-19 testing with a probability greater than chance  
28 were the proportion of Black/African American residents and proportion of older persons.

29  
30 **Conclusions.** Areas with large proportions of Black/African American residents are at markedly  
31 higher risk that is not fully explained by characteristics of the environment and pre-existing  
32 conditions in the population.

33  
34 Word Count: 3370

35 Tables: 3

36 Figures: 4

37  
38 Corresponding Author: Charles DiMaggio, PhD, MPH  
39 Professor of Surgery and Population Health  
40 Department of Surgery  
41 New York University School of Medicine  
42 462 First Avenue, NBV 15  
43 New York, NY 10016-9196  
44 Charles.DiMaggio@nyumc.org  
45 Office: 212.263.3202  
46 Mobile: 516.633.2190

## 47 **Blacks/African American Communities are at Highest Risk of COVID-** 48 **19: Spatial Modeling of New York City ZIP Code-Level Testing Results**

49 **Introduction.** The population and spatial characteristics of COVID-19 infections are poorly  
50 understood, but there is increasing evidence that in addition to individual clinical factors,  
51 demographic, socioeconomic and racial characteristics play an important role.

52 **Methods.** We analyzed positive COVID-19 testing results counts within New York City ZIP Code  
53 Tabulation Areas (ZCTA) with Bayesian hierarchical Poisson spatial models using integrated nested  
54 Laplace approximations.

55 **Results.** Spatial clustering accounted for approximately 32% of the variation in the data. For every  
56 one unit increase in a scaled standardized measure of Chronic Obstructive Pulmonary Disease  
57 (COPD) in a community, there was an approximate 8-fold increase in the risk of a positive COVID-19  
58 test in a ZCTA (Incidence Density Ratio = 8.2, 95% Credible Interval 3.7, 18.3). There was a nearly  
59 five-fold increase in the risk of a positive COVID-19 test. (IDR = 4.8, 95% Cr I 2.4, 9.7) associated  
60 with the proportion of Black / African American residents. Increases in the proportion of residents  
61 older than 65, housing density and the proportion of residents with heart disease were each  
62 associated with an approximate doubling of risk. In a multivariable model including estimates for  
63 age, COPD, heart disease, housing density and Black/African American race, the only variables that  
64 remained associated with positive COVID-19 testing with a probability greater than chance were the  
65 proportion of Black/African American residents and proportion of older persons.

66 **Conclusions.** Areas with large proportions of Black/African American residents are at markedly  
67 higher risk that is not fully explained by characteristics of the environment and pre-existing  
68 conditions in the population.

## 69 Introduction

70 The SARS-Cov-2 virus poses unprecedented clinical and public health challenges world-wide.  
71 While much of the attention has been rightfully focused on the clinical aspects of the disease,  
72 epidemiological studies and prevention research are becoming of increasing importance,  
73 particularly as no effective therapeutic has yet been identified.<sup>1</sup> Epidemiological and population-  
74 based studies can contribute to the identification of patient risk factors for disease severity.  
75 Recent studies of observational registry data have found COVID-19 mortality to be  
76 independently associated with coronary artery disease (CAD) (Odds Ratio (OR) for  
77 mortality=2.7, 95% CI 2.1, 3.5), chronic obstructive pulmonary disease (COPD) (OR =3.0; 95%  
78 CI, 2.0 to 4.4), and age greater than 65 years (OR = 1.9; 95% CI, 1.6 to 2.4).<sup>2</sup> In one case  
79 series, 68% of laboratory-confirmed COVID-19 ICU patients had at least one comorbidity, of  
80 which hypertension was most common.<sup>3</sup>

81 Not all risks, however, are physiologic. As the COVID-19 pandemic continues to ravage  
82 communities across the United States and the world, attention is increasingly turning to  
83 population-level demographic, socioeconomic, racial and environmental risk factors for COVID-  
84 19. Blacks/African Americans have been reported to contract and die from COVID-19 at higher  
85 rates than others.<sup>4</sup> In Chicago, a large number of COVID-19 deaths are concentrated in five  
86 largely black neighborhoods.<sup>5</sup> A similar mortality concentration among Black/African American  
87 persons has been reported in New Orleans.<sup>6</sup> At the built-environmental level, drivers of disease  
88 include population density<sup>7</sup> and housing density, with urban counties in the US having the  
89 highest COVID-19 death rates.<sup>8</sup>

90 Few regions of the US have been more grievously affected than the five boroughs of New York  
91 City. A neighborhood-level analysis of New York City found higher rates of COVID-19 disease in  
92 areas with higher population shares of Black/African American and Hispanic persons, and in

93 areas with higher population density.<sup>9</sup> While it certainly is possible that those affected have  
94 higher rates of underlying health conditions that may increase their susceptibility to the virus, the  
95 authors speculate that “residents of these neighborhoods are less likely to be able to work from  
96 home, disproportionately rely on public transit during the crisis, are less likely to have internet  
97 access,” and “have higher rates of overcrowding at the household level.”

98 In this analysis, we analyze positive COVID-19 testing result counts within New York City ZIP  
99 Code Tabulation Areas (ZCTA) using Bayesian hierarchical Poisson spatial models with  
100 integrated nested Laplace approximations. We attempt to quantify the amount of spatial  
101 clustering in New York City neighborhoods, and the association of positive test counts in a  
102 neighborhood with population-level estimates of demographic, socioeconomic, health, and built  
103 environmental variables. The results quantify and provide insights into the complex interplay of  
104 individual and ecologic risks for COVID-19 spread and may be helpful in the effective allocation  
105 of testing resources and interventions in similar urban settings.

## 106 **Methods**

### 107 **Data**

108 COVID-19 test result data were obtained from the New York City Department of Health and  
109 Mental Hygiene (NYC DOHMH) [GitHub Page](#). Variables consisted of ZIP Code Tabulation Area  
110 (ZCTA) designation, total number of positive test and total number of tests performed. Files are  
111 updated approximately every 2 days. The data in these analyses were current as of 22 April  
112 2020.

113 ZCTA-level data for total population, proportion of persons older than 65, number of persons  
114 self-identifying as Black/African American, Asian or Hispanic, number of persons older than 5  
115 speaking a language other than English, population density, housing density, school density,

116 (number of people, housing structures and schools per square mile respectively), proportion of  
117 persons receiving public assistance, were obtained from or derived from the US Census.<sup>10</sup>

118 We created a social fragmentation index based on the work of Congdon<sup>11</sup> which combines 4  
119 variables extracted from US census variables: the proportion of total housing units in a ZCTA  
120 that are not owner occupied, the proportion of vacant housing units, the proportion of individuals  
121 living alone, and the proportion of units into which someone recently moved. Based on Census  
122 definitions, a “recent” move is defined as anytime in the previous 9 years (since the last  
123 decennial census). Variables are standardized and added with equal weight. The resulting  
124 variable is normally distributed with mean zero and 95% quantiles -2.463311 and 2.205669.

125 Data on ZCTA health metrics were derived from shapefiles downloaded from the Simply  
126 Analytics company<sup>12</sup> and consisted of the number of persons in a ZCTA with heart disease or  
127 congestive heart failure (which are combined as a metric) and the number of persons with  
128 COPD.

129 Spatial shapefiles of New York City ZCTAs were downloaded and derived from the New York  
130 City Department of City Planning.<sup>13</sup> The testing and covariate data were merged to the spatial  
131 shapefile data and restricted to ZCTAs with valid data entries. An adjacency matrix was created  
132 from the map file using the R tool `spdep::poly2nb()`, and manually edited to create  
133 adjacencies between New York City boroughs using `spdep::edit.nb()`.

## 134 **Statistical Analysis**

135 After merging the testing to the covariate data, descriptive statistics consisted of counts, means  
136 and medians and maps of the number of positive COVID-19 tests per 10,000 total population  
137 and 10,000 tests performed in a ZCTA.

138 Counts of positive COVID-19 test results in New York City ZCTAs were spatially modeled  
139 according to Besag-York-Mollie as described by Lawson.<sup>14-16</sup>

$$\begin{aligned} y_i &\sim \text{Pois}(\lambda_i = e_i \theta_i) \\ \log(\theta_i) &= \beta x_i + v_i + \eta_i \\ v &\sim \text{nl}(0, \tau_v) \\ \eta &\sim \text{nl}(\overline{\eta_\delta}, \tau_\eta / n_\delta) \end{aligned}$$

141 where,

- 142 1. the  $y_i$  counts in area  $i$ , are independently identically Poisson distributed and have an  
143 expectation in area  $i$  of  $e_i$ , the expected count, times  $\theta_i$ , the risk for area  $i$ .
- 144 2. a logarithmic transformation ( $\log(\lambda_i)$ ) allows a linear, additive model of regression terms  
145 ( $\beta x_i$ ), along with
- 146 3. a spatially random effects component ( $v_i$ ) that is i.i.d normally distributed with mean zero  
147 ( $\sim \text{nl}(0, \tau_\eta)$ ), and
- 148 4. a conditional autoregressive spatially structured component ( $\eta \sim \text{nl}(\overline{\eta_\delta}, \tau_\eta / n_\delta)$ ) in which a  
149 “neighborhood” consisting of spatially adjacent shapes is characterized by the normally  
150 distributed mean of the spatially structured random effect terms for the spatial shapes that  
151 make up the neighborhood ( $\overline{\eta_\delta}$ ), and the standard deviation of that mean divided by the  
152 number of spatial shapes in the neighborhood ( $\tau_\eta / n_\delta$ ). This spatially structured conditional  
153 autoregression component is also sometimes described as a Gaussian process  $\lambda \sim$   
154  $\text{NL}(W, \tau_\lambda)$  where  $W$  represents the matrix of neighbors that defines the neighborhood  
155 structure, and the conditional distribution of each  $\lambda_i$ , given all the other  $\lambda_i$  is normal with  $\mu$   
156 = the average  $\lambda$  of it,s neighbors and a precision ( $\tau_\lambda$ ).

157 A baseline convolution model that consisted solely of an intercept term with unstructured and  
158 spatially structured random effect terms was extended to include univariate association of  
159 explanatory variables with the number of positive COVID-19 tests in a ZCTA. Important and

160 likely associations were chosen for inclusion in a multivariable model with the primary exposure  
161 variable being the proportion of Black/African American residents in an area and additional  
162 explanatory variables included as potential confounders.

163 The final linear model consisted of an intercept ( $\beta_0$ ); a vector of scaled ZCTA-level explanatory  
164 variables ( $\beta x_i^T$ ) for the proportion of persons in a ZCTA identifying as Black/African American,  
165 with COPD, heart disease, older than 65 years, a measure of housing density, a spatially  
166 unstructured random effect term ( $v_i$ ), and a spatially structured conditional autoregression term  
167 ( $\eta_i$ ). An offset variable for the total number of tests was included in all models. Model selection  
168 was based on deviance information criteria and number of effective parameters.

169 
$$\log(\theta_{ij}) = \beta_0 + \beta x_i^T + v_i + \eta_i + (offset)$$

170 The spatially unstructured random effect term captures normally-distributed or Gaussian  
171 random variation around the mean or intercept. The spatially-structured conditional  
172 autoregression term accounts for local geographic influence. The intercept is interpreted as the  
173 average city-wide risk on the log scale adjusted for the covariates, random effects and spatial  
174 terms. The exponentiated coefficients for the explanatory covariates are interpreted as  
175 incidence density ratios. Coefficient results are presented with 95% Bayesian Credible Intervals  
176 (95% Cr I)

177 Spatial risk, controlling for or holding the covariates constant, was calculated as  $\zeta_i = v_i + \eta_i$ ,<sup>17</sup>  
178 and is interpreted as the residual spatial risk for each area (compared to all of New York City)  
179 after covariates and spatial clustering are taken into account. The probability of spatial risk  
180 greater than 2 ( $\Pr[e^{\zeta_i} > 1]$ ) was calculated. As originally described by Clayton and  
181 Bernardinelli,<sup>18</sup> these exceedance probabilities are the posterior probabilities for an area's  
182 spatial risk estimate exceeding some pre-set value. This was extended by Richardson, et al<sup>19</sup> to  
183 decision rules "for classifying whether (an area) has an increased risk based on how much of

184 the posterior distribution of the relative risk parameter ... exceeds a reference threshold".<sup>20</sup> They  
185 are calculated as the proportion of simulations for which the linear combination of effects ( $\zeta$ )  
186 exceeds the target value. Lastly, the proportion of spatially explained variance was calculated  
187 as the proportion of total spatial heterogeneity accounted for by the spatially structured  
188 conditional autoregression variance.<sup>17</sup>

189 Spatial modeling was conducted using integrated nested Laplace approximations (INLA) with  
190 the R INLA package<sup>21</sup> using approaches described by Blangiardo, et al.<sup>17</sup> The study protocol  
191 was exempted as not human research by the New York University School of Medicine  
192 Institutional Review Board.

## 193 **Results**

### 194 **Descriptive Statistics**

195 There were 177 ZCTA's in the data set. The mean COVID-19 positive test rate per 10,000  
196 ZCTA population was 166.2 (95% CI 156.7, 175.7). The mean COVID-19 positive test rate per  
197 10,000 tests was 5,176.0 (95% CI 5,045.9, 5,306.1) and appeared skewed and peaked,  
198 indicating that a relatively small number of ZCTAs accounted for highest rates. (Figure 1) The 5  
199 ZCTAs with highest positive COVID-19 test numbers per 10,000 population were the same as  
200 those with the highest proportion per 10,000 tests (10464, 10470, 10455, 10473, 11234, and  
201 11210). The 5 lowest ZCTAs were also the same for both measures (11103, 11102, 11693,  
202 11369, 11363, and 10308). Table 1 presents comparative statistics for the ZCTA's with the  
203 highest and lowest quantiles for population-based positive test rates. Figure 2 presents a  
204 choropleth of positive COVID-19 tests per 10,000 per 10,000 positive tests.



## 205 **Spatial Models**

206 A frailty model consisting of only a random effect term and no explicit spatial component,  
207 returned a deviance information criteria (DIC) 1831.58, with 174.5 effective parameters. The  
208 random effect term was normally distributed around the mean value of 64.9 (sd= 1.1, 95%  
209 Credible Interval 55.5 , 75.6) reflecting random nature of the distribution of the unstructured  
210 heterogeneity or variance.

211 A convolution model with a spatially-structured conditional autoregression term added to the  
212 spatially-unstructured heterogeneity random effect term of the frailty model, returned a DIC of  
213 1807.60 (with 175.98 effective parameters) reflecting an improvement over the baseline  
214 unstructured heterogeneity frailty model, and indicating the spatial component added  
215 information to the simple unstructured model. In Figure 3, the spatial risk estimate is calculated  
216 as the sum of the unstructured and spatially structured variance components ( $\zeta = \nu + \nu$ )  
217 Finally, in figure 4, we calculate and map the probability of relative risk greater than 1, which is  
218 interpreted in the context of figure 3 as a type of “hot spot” map place the risk estimates in the  
219 context of their probabilities. Lastly, we estimate the proportion of the variance explained by  
220 geographic variation or place, which for this model is approximately 32%

## 221 **Simple and Multivariable Models**

222 The convolution model is extended to include ecological-level variables for population, housing,  
223 income, social fragmentation, population characteristics, and clinical conditions. Table 2  
224 summarizes the results of a series of unadjusted single Covariate Models of Associations with  
225 Positive COVID-19 Test Counts. The single strongest unadjusted association is for the  
226 proportion of persons in a ZCTA with COPD, which returned an incidence density ratio (IDR) of  
227 8.2 (95% Credible Interval 3.7, 18.3), indicating that for each single unit increase in the  
228 standardized proportion of persons in a ZCTA with COPD, there was an eight-fold increased

229 risk of an additional positive COVID-19 test in that ZCTA. The proportion of Black/African  
230 American residents in a ZCTA was also strongly associated with the risk of positive COVID-19  
231 tests. For every one unit increase in a scaled standardized measure of the proportion of  
232 Black/African American residents, there was a nearly five-fold increase in the risk of a positive  
233 COVID19 test. (IDR = 4.8, 95% Cr I 2.4, 9.7)

234 Variables for population density, proportion of residents older than 65 years, housing density,  
235 and heart disease were also associated with increased risk of positive COVID-19 testing rates.  
236 Median household income (MHI) in a ZCTA community was inversely related to positive COVID-  
237 19 tests. For each unit increase in a standardized measure of MHI in a ZIP Code Tabulation  
238 Area, there is an approximately 46% *decrease* in the number of positive COVID19 tests.  
239 (Incidence Density Ratio = 0.54, 95% CrI 0.43, 0.69). Other variables that were associated with  
240 lower positive tests were proportion of Asian and proportion of Hispanic residents and increased  
241 measures of social fragmentation. School density, proportion of persons not speaking English,  
242 and the proportion of persons on public assistance were not associated with positive COVID-19  
243 testing rates.

244 In a multivariable model including COPD, heart disease, proportion of Black/African American  
245 residents, housing density, and age greater than 65 years, the only 2 variables that remained  
246 associated with positive COVID-19 testing with a probability greater than chance were the  
247 proportion of Black/African American residents and older persons. (Table 4) Proportion of  
248 Black/African American residents was the strongest predictor of higher positive testing rates in a  
249 community regardless of other factors.

## 250 **Discussion**

251 Despite the recent onset of the current COVID-19 pandemic, there is already growing evidence  
252 about both individual risk factors and population-level drivers of disease and mortality. This

253 study adds to the number of very recent similar spatial analyses of ZCTA-level testing data  
254 released by the New York City Department of Health and Mental Hygiene,<sup>22-24</sup> and illustrates  
255 the importance of sharing these kinds of data, as well as the informative nature of spatial  
256 epidemiology as the pandemic evolves across the nation and the world. Consistent with prior  
257 reports, we find that the clustering of positive COVID-19 testing results in NYC are unlikely to be  
258 due to chance,<sup>9, 23</sup> and is driven in large measure by socioeconomics, age distribution,<sup>24</sup> and  
259 race.<sup>9, 23</sup>

260 Our study adds to this by demonstrating that the proportion of residents self-identifying as  
261 Black/African American is among the single strongest unadjusted bivariate predictors of the  
262 proportion of positive tests in a community. The only stronger such predictor is the proportion of  
263 residents with COPD, which at 8 times the risk of areas with less COPD, is stunning. But  
264 perhaps the more unexpected finding is that when Black/African American race and COPD are  
265 considered jointly, it is race that appears to be the stronger predictor. Unlike a previous New  
266 York City-based report,<sup>9</sup> we did not find an independent risk associated with the proportion of  
267 Hispanic residents. It may be that census estimates of Black/African American persons includes  
268 persons who also identify as Hispanic. Three of the 5 ZCTAs with highest positive COVID-19  
269 test numbers per 10,000 population were in areas of the Bronx with large proportions of  
270 Hispanic and Latino residents. And, it may be that disparities may vary depending in part on  
271 how well-established Hispanic communities are within cities and states.<sup>25</sup>

272 The question of why COVID-19 affects one community more severely than another may provide  
273 clues to crucial questions about who is a risk and why.<sup>26</sup> Our study indicates place is important.  
274 We find about a third of the variance in a simple spatial model can be accounted for by place.  
275 We found risk to be approximately doubled by environmental characteristics like population and  
276 housing density. This complements a report of a non-spatial, linear multivariable regression

277 model of similar data that reported that 72% of variance could be attributed to individual  
278 characteristics like household size, gender, age, race and immigration status.<sup>22</sup>

279 If ecologic and spatial analyses can provide clues, it remains to be determined what those clues  
280 point to. It could be that Black/African American race is a proxy for underlying physiological  
281 risks. There are preliminary reports that infection with SARS-Cov-2 may be associated with the  
282 A blood group,<sup>27</sup> and that severe COVID-19 is driven in part by coagulopathies that may be  
283 associated with Factor VIII and von Willebrand factor,<sup>28</sup> although the relationship of such  
284 factors with race is complex.<sup>29</sup> Race may also be associated with exposure. By one account,  
285 80% of non-medical staff in New York City's hard-hit public hospitals are Black/African American  
286 or Hispanic, compared to less than half of doctors and nurses. It may be that their risk of  
287 exposure to SARS-Cov-2 and need for similar personal protective equipment has been  
288 underestimated.<sup>30</sup> Our results indicate that such exposure may be a more critical factor than  
289 underlying health conditions. That a risk like COPD should drop from a level of 8 to non-  
290 significance when race is included in the model may point to something beyond physiological  
291 risk of infection. Placing risk factors in context, both within and across populations, may be key.  
292 Differences between New York City vs Chicago as a whole appear to influence the relative  
293 strength of associations between population-level demographic variables and testing  
294 outcomes.<sup>23</sup> It will be increasingly important to conduct such comparative studies.

295 Our results should be interpreted cautiously. Ecological studies can offer a view of disease  
296 processes in a community, but it may be a fractured view. Measures like school density and  
297 social fragmentation may not be measuring what we think they are measuring; the number of  
298 schools in an area, rather than acting as a disease multiplier, may be a measure of the strength  
299 of the tax base. Similarly, the Congdon Index treats empty houses as a measure of disorder, but  
300 this has a very different meaning in the setting of a rapidly-spreading infectious disease. The  
301 proportion of non-English speakers in a given ZCTA may be biased by a lack of self-reporting by

302 undocumented immigrants. And, as in any ecologic study, it is not certain that the persons with  
303 the risk factor being studied are those who are developing the outcome.

304 SARS-Cov-2 testing results are imperfect, with numbers likely to be biased by the availability of  
305 testing. But, we would expect that bias, to be in the direction of increased counts in areas with  
306 higher socioeconomic status. Consistent with our findings, a recent geographic analysis  
307 reported that persons in poorer NYC neighborhoods were less likely to be tested but once  
308 tested were more likely to test positive.<sup>22</sup> It is partly for this reason, we chose to base most of  
309 our analyses on the proportion of positive tests, rather than the population-based rates of  
310 positive tests, an approach taken by others.<sup>22</sup>

311 Despite these caveats, it is difficult to overlook the interplay of race and COVID-19. Race  
312 appears to be an indicator of risk independent of social status, income, built environment or  
313 even underlying health. This has implications not only for justice and equity, but for an effective  
314 response to the pandemic.

## 315 **References**

316

- 317 1. Information for Clinicians on Investigational Therapeutics for Patients with COVID-19.  
318 Centers for Disease Control and Prevention: Coronavirus Disease 2019 (COVID-19). Published  
319 online April 25, 2020. <https://www.cdc.gov/coronavirus/2019-ncov/hcp/therapeutic-options.html>
- 320 2. Mehra MR, Desai SS, Kuy S, Henry TD, Patel AN. Cardiovascular disease, drug therapy, and  
321 mortality in covid-19. *N Engl J Med*. Published online May 2020. doi:[10.1056/NEJMoa2007621](https://doi.org/10.1056/NEJMoa2007621)
- 322 3. Grasselli G, Zangrillo A, Zanella A, et al. Baseline characteristics and outcomes of 1591  
323 patients infected with SARS-Cov-2 admitted to ICUs of the Lombardy region, Italy. *JAMA*.  
324 Published online April 2020. doi:[10.1001/jama.2020.5394](https://doi.org/10.1001/jama.2020.5394)
- 325 4. Yancy CW. COVID-19 and African Americans. *JAMA*. Published online April 2020.  
326 doi:[10.1001/jama.2020.6548](https://doi.org/10.1001/jama.2020.6548)
- 327 5. Reyes C GC Husain N. Chicago,s coronavirus disparity: Black Chicagoans are dying at  
328 nearly six times the rate of white residents, data show. *Chicago Tribune*. Published online 2020.  
329 <https://www.chicagotribune.com/coronavirus/ct-coronavirus-chicago-coronavirus-deaths->

- 330 [demographics-lightfoot-20200406-77nlylhiavgjzb2wa4ckivh7mu-story.html](#). Accessed 9 May  
331 2020
- 332 6. M D. Louisiana data: Virus hits Blacks, people with hypertension. *US News World Report*.  
333 Published online 2020. [https://www.usnews.com/news/best-states/louisiana/articles/2020-04-](https://www.usnews.com/news/best-states/louisiana/articles/2020-04-07/louisiana-data-virus-hits-blacks-people-with-hypertension)  
334 [07/louisiana-data-virus-hits-blacks-people-with-hypertension](https://www.usnews.com/news/best-states/louisiana/articles/2020-04-07/louisiana-data-virus-hits-blacks-people-with-hypertension) Accessed 9 May 2020
- 335 7. CDC COVID-19 Response Team. Geographic differences in covid-19 cases, deaths, and  
336 incidence - united states, February 12 - April 7, 2020. *MMWR Morb Mortal Wkly Rep*.  
337 2020;69(15):465-471. doi:[10.15585/mmwr.mm6915e4](https://doi.org/10.15585/mmwr.mm6915e4)
- 338 8. R F. The geography of coronavirus. *Bloomberg CityLab*. Published online 2020.  
339 [https://www.citylab.com/equity/2020/04/coronavirus-spread-map-city-urban-density-suburbs-](https://www.citylab.com/equity/2020/04/coronavirus-spread-map-city-urban-density-suburbs-rural-data/609394/)  
340 [rural-data/609394/](https://www.citylab.com/equity/2020/04/coronavirus-spread-map-city-urban-density-suburbs-rural-data/609394/) Accessed 9 May 2020
- 341 9. COVID-19 cases in New York City, a neighborhood-level analysis. *The Stoop: NYU Furman*  
342 *Center Blog*. Published online 2020. [https://furmancenter.org/thestoop/entry/covid-19-cases-in-](https://furmancenter.org/thestoop/entry/covid-19-cases-in-new-york-city-a-neighborhood-level-analysis)  
343 [new-york-city-a-neighborhood-level-analysis](https://furmancenter.org/thestoop/entry/covid-19-cases-in-new-york-city-a-neighborhood-level-analysis) Accessed 9 May 2020
- 344 10. US Census Bureau. Washington, DC : 2010. <https://data.census.gov/cedsci/> Accessed 9  
345 May 2020
- 346 11. Congdon P. Bayesian models for suicide monitoring. *European J Population*. 2001;15(3):1-  
347 34.
- 348 12. SimplyAnalytics. <https://simplyanalytics.com/> Accessed 9 May 2020
- 349 13. City Planning NYCD of. Bytes of the big apple. Published online 2011.  
350 <https://www1.nyc.gov/site/planning/data-maps/open-data.page> Accessed 9 May 2020.
- 351 14. Besag J, York J, Mollie A. Bayesian image restoration, with two applications in spatial  
352 statistics. *Ann Inst Statist Math*. 1991;43(1):1-59.
- 353 15. Lawson A, Biggeri A, Boehning D, et al. Disease mapping models: An empirical evaluation.  
354 Disease mapping collaborative group. *Stat Med*. 2000;19(17-18):2217-2241.
- 355 16. Lawson AB. *Bayesian Disease Mapping: Hierarchical Modeling in Spatial Epidemiology,*  
356 *Second Edition (Chapman & Hall/CRC Interdisciplinary Statistics)*. Chapman; Hall/CRC;  
357 2013:396.
- 358 17. Blangiardo M, Cameletti M, Baio G, Rue H. Spatial and spatio-temporal models with r-INLA.  
359 *Spat Spatiotemporal Epidemiol*. 2013;7:39-55.
- 360 18. Clayton D, Bernardinelli L. Bayesian methods for mapping disease risk. *Geographical and*  
361 *environmental epidemiology: methods for small area studies*. Published online 1992:205-220.
- 362 19. Richardson S, Thomson A, Best N, Elliott P. Interpreting posterior relative risk estimates in  
363 disease-mapping studies. *Environ Health Perspect*. 2004;112(9):1016-1025.
- 364 20. Best N, Richardson S, Thomson A. A comparison of Bayesian spatial models for disease  
365 mapping. *Stat Methods Med Res*. 2005;14(1):35-59.

- 366 21. Rue H, Martino S, Lindgren F, Simpson D, Riebler A. INLA: Functions which allow to  
367 perform full bayesian analysis of latent gaussian models using integrated nested Laplace  
368 approximation. Published online 2013. [https://rdrr.io/github/andrewzm/INLA/man/INLA-  
370 package.html](https://rdrr.io/github/andrewzm/INLA/man/INLA-<br/>369 package.html) Accessed 9 May 2020
- 371 22. Borjas GJ. *Demographic Determinants of Testing Incidence and Covid-19 Infections in New*  
372 *York City Neighborhoods*. National Bureau of Economic Research; 2020.  
373 [https://www.hks.harvard.edu/publications/demographic-determinants-testing-incidence-and-  
375 covid-19-infections-new-york-city](https://www.hks.harvard.edu/publications/demographic-determinants-testing-incidence-and-<br/>374 covid-19-infections-new-york-city) Accessed 9 May 2020
- 376 23. Maroko AR, Nash D, Pavilonis B. Covid-19 and inequity: A comparative spatial analysis of  
377 New York City and Chicago hot spots. *medRxiv*.  
378 <https://www.medrxiv.org/content/10.1101/2020.04.21.20074468v1> Published online 2020.  
379 Accessed 9 May 2020
- 380 24. Whittle RS, Diaz-Artiles A. An ecological study of socioeconomic predictors in detection of  
381 covid-19 cases across neighborhoods in New York City. *medRxiv*.  
382 <https://www.medrxiv.org/content/10.1101/2020.04.17.20069823v1> Published online 2020. Accessed 9  
383 May 2020
- 384 25. Jordon M and Oppel RA. For Latinos and COVID-19, Doctors are Seeing an "Alarming"  
385 Disparity. *New York Times*. 7 May 2020 [https://www.nytimes.com/2020/05/07/us/coronavirus-  
latinos-disparity.html?referringSource=articleShare](https://www.nytimes.com/2020/05/07/us/coronavirus-<br/>386 latinos-disparity.html?referringSource=articleShare). Accessed 9 May 2020
- 387 26. Beech H KA Rubin AJ, R M. The covid-19 riddle: Why does the virus wallop some places  
388 and spare others? *New York Times*. Published online May 2020.  
389 <https://www.nytimes.com/2020/05/03/world/asia/coronavirus-spread-where-why.html> Accessed  
390 9 May 2020
- 391 27. Zhao J, Yang Y, Huang H-P, et al. Relationship between the ABO blood group and the  
392 covid-19 susceptibility. *medRxiv*.  
393 <https://www.medrxiv.org/content/10.1101/2020.03.11.20031096v2>  
394 Published online 2020. Accessed 9 May 2020
- 395 28. Panigada M, Bottino N, Tagliabue P, et al. Hypercoagulability of covid-19 patients in  
396 intensive care unit. A report of thromboelastography findings and other parameters of  
397 hemostasis. *J Thromb Haemost*. Published online April 2020. doi:[10.1111/jth.14850](https://doi.org/10.1111/jth.14850)
- 398 29. Miller CH, Dilley A, Richardson L, Hooper WC, Evatt BL. Population differences in von  
399 willebrand factor levels affect the diagnosis of von willebrand disease in african-american  
400 women. *Am J Hematol*. 2001;67(2):125-129. doi:[10.1002/ajh.1090](https://doi.org/10.1002/ajh.1090)
- 401 30. Hong N. 3 hospital workers gave out masks. Weeks later, they all were dead. *New York*  
402 *Times*. Published online May 2020. [https://www.nytimes.com/2020/05/04/nyregion/coronavirus-  
ny-hospital-workers.html](https://www.nytimes.com/2020/05/04/nyregion/coronavirus-<br/>403 ny-hospital-workers.html) Accessed 9 May 2020

404

405 **Tables and Figures**  
 406

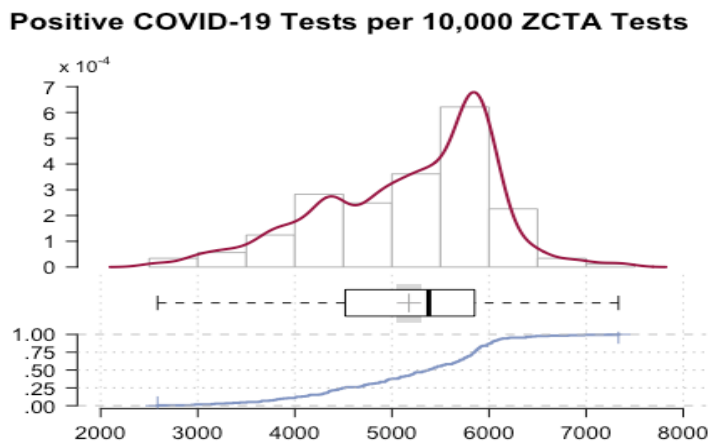

407  
 408 Figure 1. COVID-19 Positive Test rate per 10,000 tests. New York City, April 3- 22, 2020.

409  
 410  
 411

| var                | total                      | High                       | Low                        | V5    |
|--------------------|----------------------------|----------------------------|----------------------------|-------|
| n                  | 72                         | 36 (50.0%)                 | 36 (50.0%)                 |       |
| MHI                | 57,758.653<br>(24,986.680) | 55,314.528<br>(19,700.606) | 82,917.333<br>(27,557.029) | *** , |
| School Density     | 5.167 (4.605)              | 2.658 (1.977)              | 7.289 (5.379)              | *** , |
| Population Density | 16,584.935<br>(11,770.940) | 9,486.726<br>(7,238.221)   | 26,000.104<br>(13,418.550) | *** , |
| Housing Density    | 18,165.214<br>(19,748.001) | 8,784.774<br>(6,788.215)   | 37,361.654<br>(33,665.045) | *** , |
| Congdon Index      | -0.089 (1.996)             | -1.118 (1.978)             | 1.603 (1.942)              | *** , |
| Black              | 0.234 (0.263)              | 0.355 (0.308)              | 0.069 (0.125)              | *** , |
| Hispanic           | 0.124 (0.045)              | 0.134 (0.045)              | 0.120 (0.051)              | ,     |
| Heart Disease      | 0.111 (0.207)              | 0.174 (0.268)              | 0.072 (0.160)              | ,     |
| COPD               | 2.011 (1.932)              | 2.276 (2.482)              | 1.554 (1.420)              | ,     |

412 Table 1. Comparative Statistics Positive COVID-19 Tests per 10,000 Population, High and Low Quantile  
 413 ZIP Code Tabulation Area. New York City, April 3- 22, 2020.

414  
 415



Positive COVID19 Tests per 10,000 Tests,  
New York City ZIP Code Tabulation Areas April 3-22, 2019

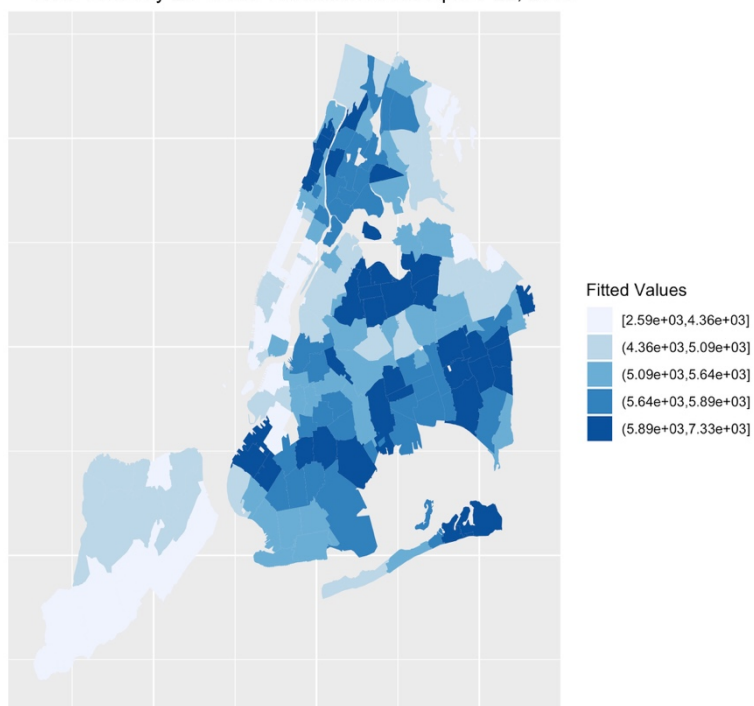

416

417 Figure 2. Choropleth Quintiles Positive COVID-19 Tests per 10,000 Tests. New York City, April 3- 22,  
418 2020.

419

420

421

422

Spatially Structured Risk Estimates, Heterogeneity, Positive COVID19 Tests,  
New York City ZIP Code Tabulation Areas April 3-22, 2019

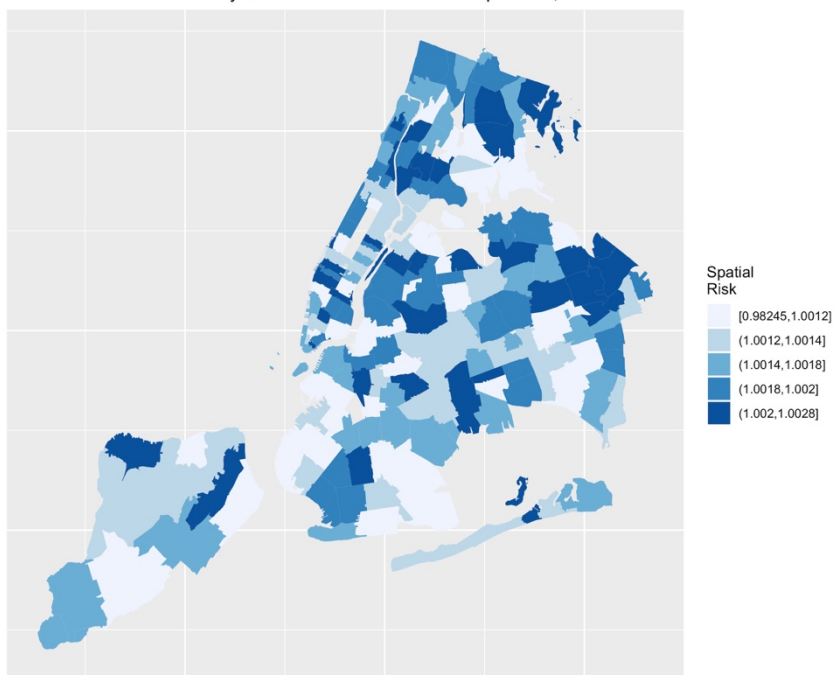

423

424 Figure 3. Choropleth Quintiles Spatial Risk Estimates (Sum of Unstructured and Spatially Structured  
425 Variance) Positive COVID-19 Tests per 10,000 Tests. New York City, April 3- 22, 2020.

426

427

428

Probability Exceedence RR > 1, Heterogeneity, Positive COVID19 Tests,  
New York City ZIP Code Tabulation Areas April 3-22, 2019

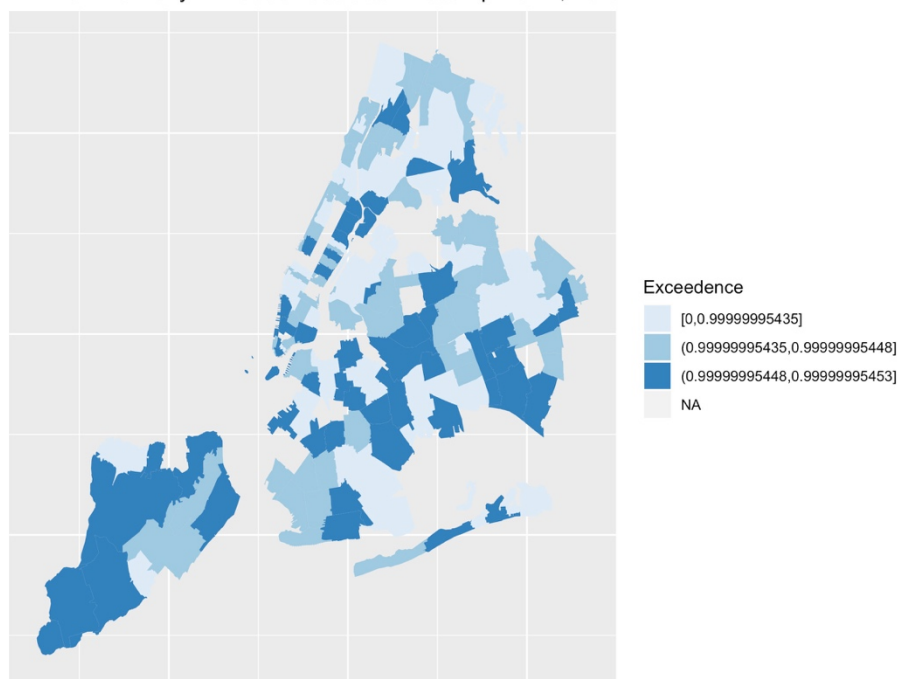

429

430 Figure 4. Choropleth Three Equal Groups, Probability of Relative Risk Greater than 1. Positive COVID-19  
431 Tests per 10,000 Tests. New York City, April 3- 22, 2020.

432

433

434

435

436

437

438

439

440

441

442

443

444

445

| Model                   | IDR | 2.5% | 97.5% |
|-------------------------|-----|------|-------|
| Population Density      | 1.5 | 1.1  | 2.2   |
| Median Household Income | 0.5 | 0.4  | 0.7   |
| School Density          | 0.8 | 0.6  | 1.2   |
| Older than 65 years     | 1.9 | 1.6  | 2.4   |
| Asian                   | 0.4 | 0.2  | 0.8   |
| Housing Density         | 2.0 | 1.2  | 3.2   |
| Congdon Index           | 0.8 | 0.8  | 0.9   |
| Language                | 1.3 | 0.9  | 1.8   |
| Black/African American  | 4.8 | 2.4  | 9.7   |
| Hispanic                | 1.2 | 0.9  | 1.6   |
| Heart Disease           | 2.1 | 1.5  | 2.9   |
| COPD                    | 8.2 | 3.7  | 18.3  |

446 Table 2. Summary Series of Unadjusted Single Covariate Bayesian Hierarchical Poisson Models for  
 447 Association with Positive COVID-19 Tests Counts in New York City ZIP Code Tabulation Areas, April 3-  
 448 22, 2020.

449

| Variable               | IDR    | 2.5%   | 97.5%  |
|------------------------|--------|--------|--------|
| Intercept              | 353.82 | 197.66 | 632.23 |
| COPD                   | 2.32   | 0.92   | 5.85   |
| Heart Disease          | 1.27   | 0.88   | 1.83   |
| Black/African American | 2.29   | 1.13   | 4.68   |
| Older than 65 years    | 1.50   | 1.17   | 1.92   |
| Housing Density        | 1.08   | 0.65   | 1.78   |

450 Table 3. Summary Multivariable Bayesian Hierarchical Poisson Modes for Association with Positive  
 451 COVID-19 Tests Counts in New York City ZIP Code Tabulation Areas, April 3- 22, 2020.
